# Supplementary material
Source: publisher figshare collection journal article supplement (https://tandf.figshare.com/articles/dataset/_/4738522)
Supplement: Supplementary file 1 [file 1]

### Supplementary Table S1

Primers used for plasmid construction

| Primer name   | Sequence (5'→3')                        |
|---------------|-----------------------------------------|
| tagRFP-F/NotI | GCAGGCTCCGCGGCCATGGTGTCTAAGGGCGAAGAGCTG |
| tagRFP-GSG-R  | GCCACTACCTCCCTTATTAAGTTTGTGCCCCAGTTTGCT |
| GSG-PABP8     | AAGGGAGGTAGTGGCATGGCTCAGATTCAGCATCAGGGT |
| PABP8-R/Ascl  | AGCTGGGTCGGCGCGTCAAGGTACGATGTTGTCTCCAAG |
| GSG-DCP1      | AAGGGAGGTAGTGGCATGTCTCAAAACGGGAAGATAATC |
| DCP1-R/Ascl   | AGCTGGGTCGGCGCGTCATTGTTGAAGTGCATTTTGTA  |

F, forward prime ; R, reverse primer.

Primer pairs used in quantitative RT-PCR

| Gene name     | Forward primer (5'→3') | Reverse primer (5'→3')   |
|---------------|------------------------|--------------------------|
| <i>VOZ1</i>   | CAGATGCTTCGTGAGTGGAA   | AAAGACCCAGAGTACCACCTT    |
| <i>VOZ2</i>   | CCATCCATATCGAAAAACCAG  | GGGTGGTTTGACATCTCCTC     |
| <i>DREB2A</i> | CAGTGTTGCCAACGGTTCAT   | AAACGGAGGTATTCCGTAGTTGAG |
