# Supplementary material
Source: publisher figshare collection journal article supplement (https://tandf.figshare.com/articles/dataset/_/4738522)
Supplement: Supplementary file 2 [file 1]

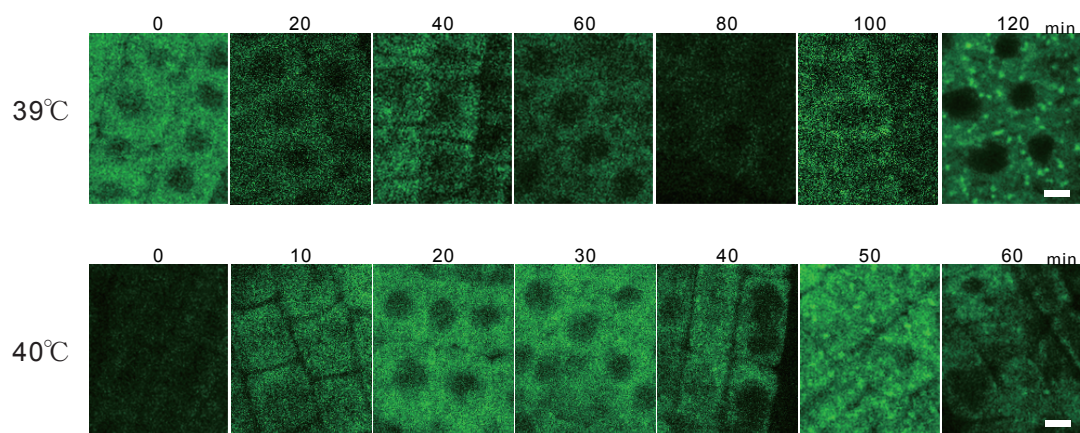

**Supplementary Figure S1. Formation time course of GFP-VOZ2 foci in various high temperature conditions.** Time course of the formation of granular structures of GFP-VOZ2 in root tip cells at two-different high temperature conditions (39, 40°C). Bars = 5  $\mu$ m.
